# Supplementary material
Source: publisher figshare collection journal article supplement (https://gsajournals.figshare.com/ndownloader/files/14234711)
Supplement: Supplementary file 1 [file 14234711]

Cross,Chromosome,Temperature,Allele,Lower bound,Upper bound,Peak position,-LOG10(pval),Causal Gene,First instance cloned,Notes
GPbx3S,2,21,BY,723181,734674,725068,9.371,SRB6,see Note S1,
GPbx3S,2,30,BY,705006,734674,721738,10.706,SRB6,see Note S1,
GPbx3S,2,37,BY,705006,734674,722069,4.056,SRB6,see Note S1,
GPbxBY,5,30,3S,368771,394911,378959,10.709,FLO8,"Taylor and Ehrenreich, 2014",2nd round backcross
GPbxBY,5,37,3S,356220,383540,376829,8.826,FLO8,"Taylor and Ehrenreich, 2014",2nd round backcross
GPbxBY,5,"21, 30, 37",3S,353654,400481,370412,6.665,FLO8,"Taylor and Ehrenreich, 2014",
GPbxBY,7,30,3S,87038,214328,116391,4.821,MDS3,"Taylor et al, 2016",
GPbx3S,7,30,BY,894815,985698,983018,6.917,MGA1,"Taylor and Ehrenreich, 2015",
GPbxBY,7,37,3S,81381,143359,122120,5.078,MDS3,"Taylor et al, 2016",2nd round backcross
GPbxBY,7,37,BY,852002,1000433,988195,4.374,MGA1,"Taylor and Ehrenreich, 2015",2nd round backcross
GPbx3S,9,21,BY,396020,400489,397417,8.101,prFLO11,"Taylor et al, 2016",MSS11-3S subpopulation
GPbx3S,9,21,BY,396027,439742,416519,14.214,prFLO11,"Taylor et al, 2016",MSS11-BY subpopulation
GPbxBY,9,30,3S,386815,394651,393166,10.709,FLO11,"Lee et al, 2016",2nd round backcross
GPbx3S,9,30,BY,395106,416603,395972,11.929,prFLO11,"Taylor et al, 2016",
GPbxBY,9,37,3S,386817,394001,389303,10.127,FLO11,"Lee et al, 2016",
GPbx3S,9,37,BY,395106,396891,395765,6.92,prFLO11,"Taylor et al, 2016",
GPbxBY,9,"21, 30, 37",3S,386511,394651,393680,6.665,FLO11,"Lee et al, 2016",
GPbx3S,11,21,BY,97364,242623,171377,4.898,TPK3,"Taylor et al, 2016",
GPbx3S,11,21,BY,97394,243150,172777,5.854,TPK3,"Taylor et al, 2016",MSS11-3S subpopulation
GPbx3S,11,30,BY,154545,257237,219727,3.703,TPK3,"Taylor et al, 2016",
GPbx3S,13,21,3S,395951,664756,579285,5.854,MSS11,"Taylor and Ehrenreich, 2014",MSS11-3S subpopulation
GPbx3S,13,21,BY,570969,605817,600491,14.214,MSS11,"Taylor and Ehrenreich, 2014",MSS11-BY subpopulation
GPbx3S,13,30,BY,548950,609784,569444,10.706,MSS11,"Taylor and Ehrenreich, 2014",
GPbx3S,13,37,BY,554372,923918,571169,4.98,MSS11,"Taylor and Ehrenreich, 2014",
GPbxBY,14,37,BY,356409,394076,357346,7.711,SRV2,this paper,2nd round backcross
GPbx3S,15,21,BY,100250,202290,167608,4.18,IRA2,"Taylor and Ehrenreich, 2014",MSS11-3S subpopulation
GPbx3S,15,21,BY,111105,223620,163591,4.283,IRA2,"Taylor and Ehrenreich, 2014",MSS11-BY subpopulation
GPbx3S,15,21,BY,129314,193871,163591,8.708,IRA2,"Taylor and Ehrenreich, 2014",
GPbx3S,15,21,BY,553016,631585,590388,4.853,SFL1,"Taylor and Ehrenreich, 2015",MSS11-BY subpopulation
GPbx3S,15,30,BY,131162,299083,174427,3.703,IRA2,"Taylor and Ehrenreich, 2014",
GPbx3S,15,30,BY,559403,628841,592804,9.617,SFL1,"Taylor and Ehrenreich, 2015",
GPbxBY,15,37,BY,498862,623604,574798,6.731,SFL1,"Taylor and Ehrenreich, 2015",2nd round backcross
GPcxBY,2,21,3S,503310,531496,517869,40.859,IRA1,"Taylor et al, 2016",
GPcxBY,4,21,3S,961848,1151234,1130680,16.42,GPI8,this paper,
GPcxBY,5,21,3S,105743,166300,112419,11.564,GCN4,this paper,
GPcx3S,5,21,BY,377154,438640,407917,8.564,PMD1,this paper,
GPcx3S,8,21,BY,98357,122190,105279,13.319,GPA1,this paper,
GPcxBY,9,21,3S,387502,394427,393359,44.464,FLO11,"Lee et al, 2016",
GPcx3S,9,21,BY,395106,397560,396024,26.391,prFLO11,"Taylor et al, 2016",
GPcx3S,12,21,BY,109399,173876,119281,6.429,SDC25,this paper,
GPcxBY,12,21,3S,642815,680926,669013,20.06,YPT6,"Lee et al, 2016",
GPcxBY,14,21,BY,445983,473648,467219,17.815,END3,"Taylor and Ehrenreich, 2014",
GPcx3S,15,21,BY,147945,182906,173978,12.549,IRA2,"Taylor and Ehrenreich, 2014",
GPcxBY,16,21,3S,429704,477416,464145,16.42,DIG1,this paper,
